# Supplementary material for: Induced transformation of amorphous silica to cristobalite on bacterial surfaces
Source: Royal Society of Chemistry journal article supplement (doi:10.1039/c5ra13619a), 2015-01-01
Supplement: c5ra13619a1.pdf [file c5ra13619a1.pdf]

## Supporting Information

# Induced Transformation of Amorphous Silica to Cristobalite on Bacterial Surface

Shuang-Hong Xue, Hao Xie\*, Hang Ping, Qi-Chang Li, Bao-Lian Su, Zheng-Yi Fu\*

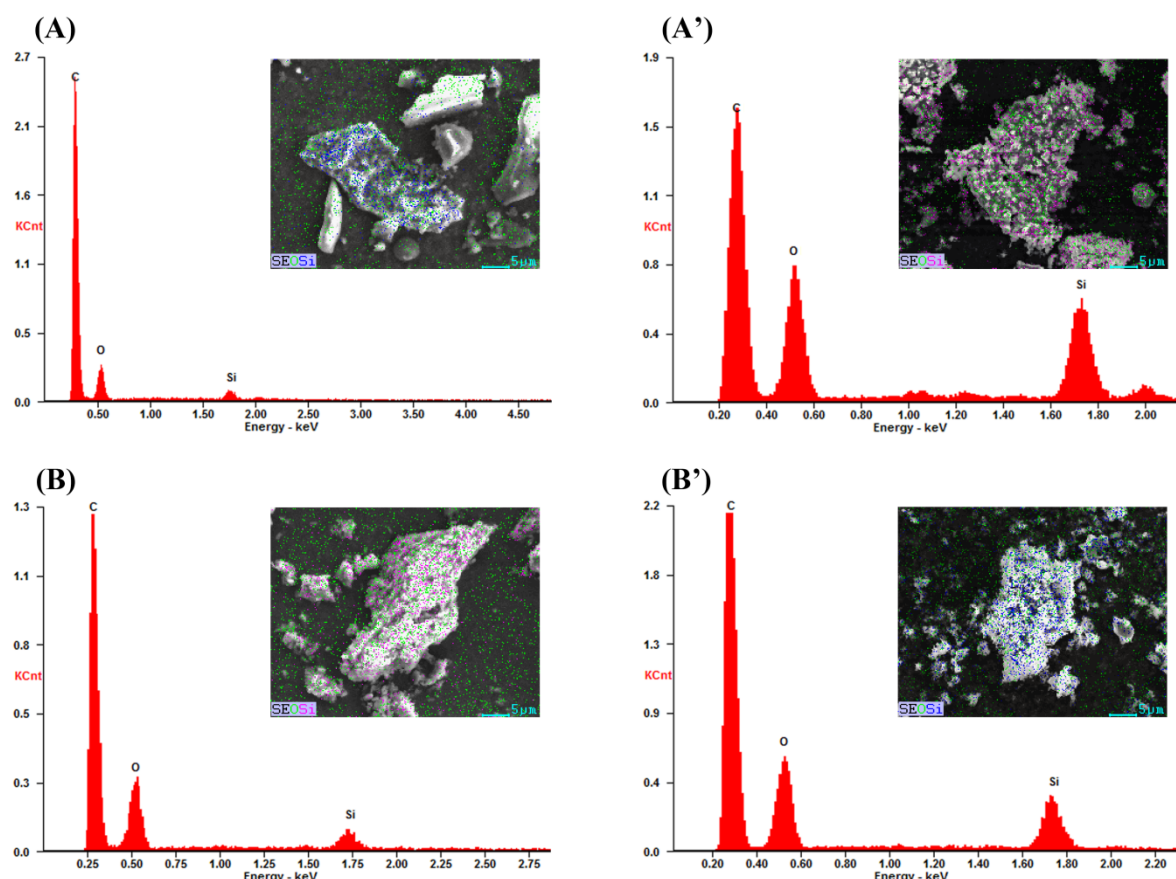

**Figure S1. EDS analysis of silica deposition on *E. coli* (Gram negative) and *Bacillus cereus* (Gram positive) surface.** Panel (A), EDS spectrum and SEM (inset) shows silicate deposition on *E. coli* surface before heating at 800°C. Panel (A'), EDS spectrum and SEM (inset) shows silicate deposition on *E. coli* surface after heating at 800°C. Panel (B), EDS spectrum and SEM (inset) shows silicate deposition on *Bacillus cereus* surface before heating at 800°C. Panel (B'), EDS spectrum and SEM (inset) shows silicate deposition on *Bacillus cereus* surface after heating at 800°C.
